# Supplementary material
Source: publisher figshare collection journal article supplement (https://diabetesjournals.figshare.com/ndownloader/files/28847505)
Supplement: Supplementary file 1 [file 28847505]

## **Supplementary Material**

### **Toll-like Receptor 2 Deficiency Abrogates Diabetic and Obese Phenotypes while Restoring Endothelial Function via Inhibition of NOX1**

Zhen Guo, PhD<sup>1\*</sup>, Yixuan Zhang, PhD<sup>1\*</sup>, Chang Liu, MS<sup>2\*</sup>, Ji Youn Youn, PhD<sup>1</sup>, Hua Cai, MD, PhD<sup>1</sup>

<sup>1</sup> Division of Molecular Medicine, Department of Anesthesiology, Division of Cardiology, Department of Medicine, David Geffen School of Medicine, University of California, Los Angeles, Los Angeles, California 90095; <sup>2</sup> Institute of Clinical Medical Sciences, China-Japan Friendship Hospital, Beijing, China

\* The authors contribute equally to this study

Corresponding address to:

Hua Cai, MD, PhD, Division of Molecular Medicine, Department of Anesthesiology, Division of Cardiology, Department of Medicine, David Geffen School of Medicine, University of California, Los Angeles, 650 Charles E. Young Drive, Los Angeles, CA 90095-7115.

Phone: 310-267-2303; Fax: 310-825-0132.

E-mail: [hcai@mednet.ucla.edu](mailto:hcai@mednet.ucla.edu)

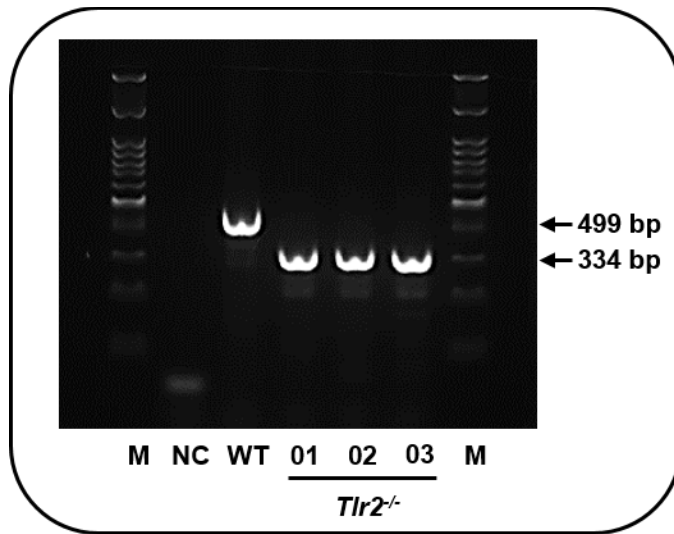

**Figure S1: Genotyping of TLR2 knockout mice.** Mouse genomic DNA was isolated using buffer containing 100 mM Tris-HCl (pH 8.5), 5 mM EDTA (pH 8.0), 200 mM NaCl and 0.2% SDS. PCR products were separated on 1.5% agarose gel, with a 334 bp band indicating presence of mutant allele. A 499 bp product from PCR indicates wild type (WT) allele.

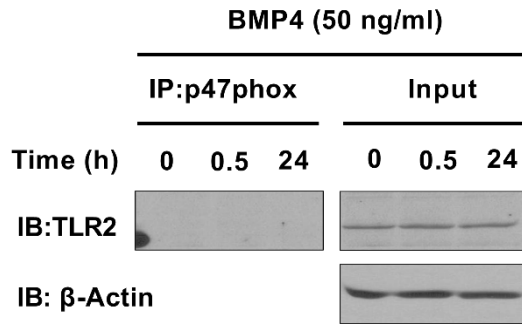

**Figure S2: TLR2 does not bind with p47phox in BMP4 treated BAECs.** Bovine aortic endothelial cells (BAECs) were treated with BMP4 at 50 ng/ml for 30 min and 24 h, and the cells were harvested for co-immunoprecipitation (co-IP). The co-immunoprecipitated TLR2 by p47phox was determined by western blot analysis, and normalized to  $\beta$ -Actin. Shown are representative co-IP blots of TLR2 by anti-NOX1 immunoprecipitation in BMP4 stimulated endothelial cells, indicating lack of binding between TLR2 and p47phox.

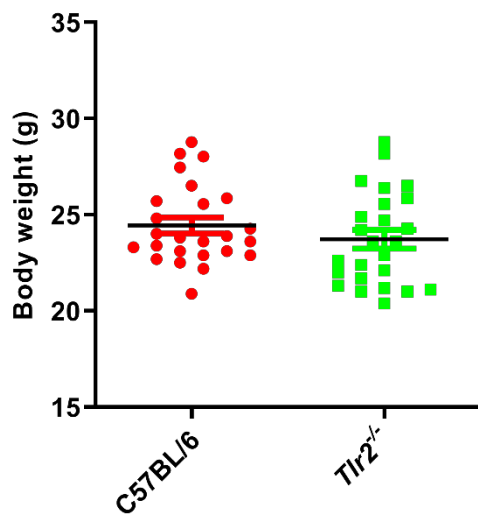

**Figure S3: Body weight is not different between WT and TLR2 knockout mice at baseline.**

Body weights of WT and TLR2 knockout mice was measured at 8 weeks old. Data are shown as Mean  $\pm$  SEM; n = 25.

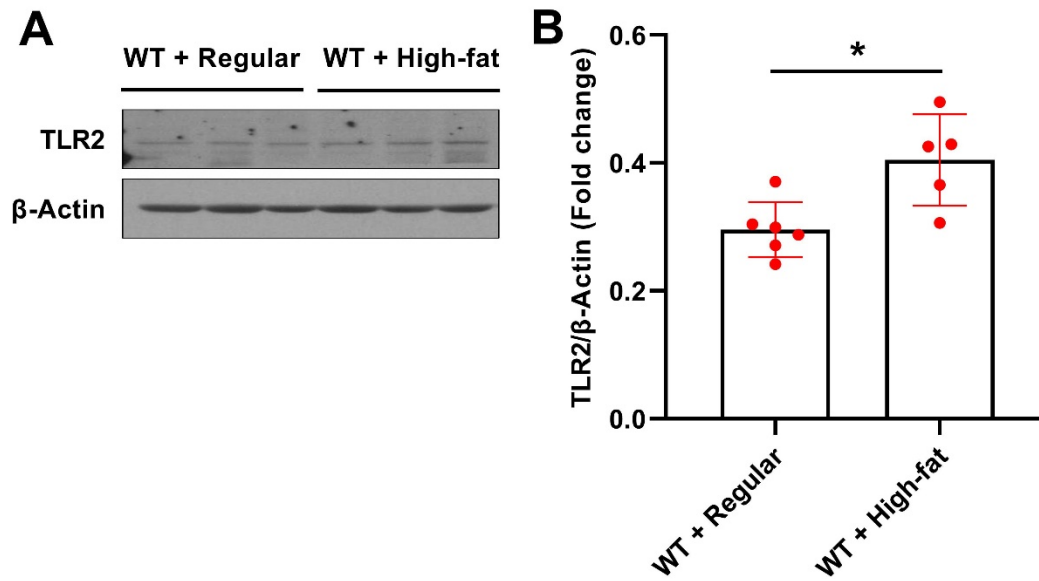

**Figure S4: High-fat diet induces upregulation of aortic TLR2 protein expression in mouse aortas.** Eight weeks old wild-type (WT) mice were fed high-fat diet for 6 weeks. **(A)** Representative western blots of TLR2/β-Actin protein expression in high-fat fed WT mice. **(B)** Grouped densitometric data of TLR2 protein expression from (A) (n = 5-6). Data are shown as Mean ± SEM. \*p<0.05.
